# Supplementary material
Source: PubMed Central journal article supplement (PMC10500628)
Supplement: NIHMS1919596-supplement-Supplementary_Material.pdf [file NIHMS1919596-supplement-Supplementary_Material.pdf]

# Underestimation of PFAS in Biosolids: Precursor Transformation During Conventional Treatment

<sup>a</sup>Jake T. Thompson, <sup>a</sup>Nicole M. Robey, <sup>b</sup>Thabet M. Tolaymat, <sup>c</sup>John A. Bowden, <sup>d</sup>Helena M Solo-Gabriele, and <sup>a</sup>Timothy G. Townsend\*

*<sup>a</sup>University of Florida, Department of Environmental Engineering Sciences,  
P. O. Box 116450, Gainesville, FL. 32611-6450, USA.*

*<sup>b</sup>United States Environmental Protection Agency, Office of Research and Development  
26 Martin Luther King Drive, Cincinnati, OH 45268, USA.*

*<sup>c</sup>University of Florida, College of Veterinary Medicine  
PO Box 100144 Gainesville, FL. 32610, USA*

*<sup>d</sup>University of Miami, Chemical, Environmental, and Materials Engineering  
1251 Memorial Drive, Coral Gables, FL 33124, USA.*

Submitted to:

*Environmental Science & Technology*

\* Corresponding Author: [ttown@ufl.edu](mailto:ttown@ufl.edu)

| <b>Title</b>                                                                                                                                                 | <b>Page</b> |
|--------------------------------------------------------------------------------------------------------------------------------------------------------------|-------------|
| <b>Sections</b>                                                                                                                                              |             |
| <i>Sample collection</i>                                                                                                                                     | S3          |
| <i>Studies to characterize PFAS in biosolids</i>                                                                                                             | S6          |
| <i>Instrumentation analysis</i>                                                                                                                              | S7          |
| <i>Section 4: Results and Extraction Efficiency</i>                                                                                                          | S19         |
| <b>Figures and Tables</b>                                                                                                                                    |             |
| <i>Table S1: Information on the pathogen removal process utilized by each facility sampled</i>                                                               | S4          |
| <i>Table S2: Table summarizing information from previous studies regarding PFAS analysis and results compared to this study.</i>                             | S6          |
| <i>Table S3: Acronyms and structures of PFAS and corresponding internal standard (IS) used for quantitation (concentration in the stock solution shown).</i> | S8          |
| <i>Table S4: LC/MS/MS operation conditions</i>                                                                                                               | S12         |
| <i>Table S5: LC/MS/MS parameters for targeted analysis.</i>                                                                                                  | S13         |
| <i>Table S6: Summary results of PFAS concentrations in biosolid processing Facility 1</i>                                                                    | S19         |
| <i>Table S7: Summary results of PFAS concentrations in biosolid processing Facility 2</i>                                                                    | S20         |
| <i>Table S8: Summary results of PFAS concentrations in biosolid processing Facility 3</i>                                                                    | S21         |
| <i>Table S9: Summary results of PFAS concentrations in biosolid processing Facility 4</i>                                                                    | S22         |
| <i>Table S10: Summary results of PFAS concentrations in biosolid processing Facility 5</i>                                                                   | S23         |
| <i>Table S11: Summary results of PFAS concentrations in biosolid processing Facility 6</i>                                                                   | S24         |

|                                                                                                 |     |
|-------------------------------------------------------------------------------------------------|-----|
| <i>Table S12: Summary results of PFAS concentrations in biosolid processing Facility 7</i>      | S25 |
| <i>Table S13: Summary results of PFAS concentrations in biosolid processing Facility 8</i>      | S26 |
| <i>Table S14: Extraction efficiencies for pooled samples of untreated and treated biosolids</i> | S27 |

## **Section 1: Sample collection**

A detailed sampling protocol and quality assurance project plan (QAPP).

### **1.0 Sample collection materials**

Due to the nature of Perfluoroalkyl and Polyfluoroalkyl Substances (PFAS) all sampling equipment containing Teflon or Teflon parts will be avoided. Items with water and/or oil repellants will be avoided. Sample collection containers are to be made of high-density polyethylene (HDPE). Labels shall not be made from water resistant paper. Nitrile gloves are to be worn when handling the bottles. The individual collecting the samples is not to wear water resistant clothing, shoes, or rain gear to avoid contamination during sample collection.

Depending upon the nature of the sampling location, biosolid and compost material samples might be collected using a methanol rinsed stainless steel shovel and placed into a 5-gallon HDPE sample container or directly placed into a 5-gal HDPE bucket from a sampling port.

### **1.1 Sample collection for dewatered biosolids and compost material**

For each biosolid sample, one 5-gallon HDPE sample container will be filled (approximately 15 kg) at the facility and transported to the University of Florida lab. A portion of each sample will be aliquoted into 2.5-quart HDPE buckets and frozen. The remainder of the sample will be stored for no longer than 14 days and tested for pH and moisture content using (EPA Method 9040C) and (ASTM D 2974-87), respectively.

In some scenarios, dewatered biosolids are transported to a separate facility for processing. The sample collection process is the same as a biosolid treatment facility except for compost. Composted biosolids are mixed with stabilization material such as mulch, animal bedding, or yard waste. Samples of stabilization materials shall be collected in one 5-gallon HDPE sample container that will be filled (approximately 12 kg) at the facility and transported to the University of Florida lab. A portion of each sample will be aliquoted into 2.5-quart HDPE buckets and frozen, based on the protocol for PFAS holding.

If PFAS analysis cannot be completed before the 28-day holding time limit, samples are to be frozen for long term storage at less than -10 °C for up to one year.

### **1.2 Sample and trip blanks**

The inclusion of blanks is critical when collecting samples for PFAS analysis given the ubiquity of the chemical. The sample blanks serve to confirm the PFAS was in fact from the biosolids sample. If blanks are positive, sources can include the deionized water used to create the blank, contamination during the process used to transport the bottles, or contamination from the surrounding air at the facility. For each biosolid facility, a blank is prepared with deionized water. The deionized water is to come from a system that does not have Teflon parts. The sample

blank bottle with deionized water is then opened near the sample collection immediately prior to the biosolid sample collection. The bottle is then poured into an empty HDPE bottle and then closed immediately after the biosolid sample is collected.

In addition to sample blanks, a trip blank will be prepared. The trip blank will consist of a 0.25 L bottle with deionized water. It will be taken on the biosolid sampling trip but will not be opened during biosolid sampling.

**Table S1** Information on the pathogen removal process utilized by each facility sampled

| Sample name | Treatment description                                                                                                                                                                                                                                                                   | Samples collected                                                     | Dry tonnes produced each year | Notes                                                                                                                                           |
|-------------|-----------------------------------------------------------------------------------------------------------------------------------------------------------------------------------------------------------------------------------------------------------------------------------------|-----------------------------------------------------------------------|-------------------------------|-------------------------------------------------------------------------------------------------------------------------------------------------|
| Facility 1  | 1:2 Ratio of biosolids to yard waste/ animal bedding. Windrows are left outside to weather for 45 days where internal temperatures can reach 60° C. Piles are inoculated with thermophilic <i>actinomyces</i> during initial mixing. Piles are screened to ¾ inch for final processing. | Biosolids prior to mixing                                             | 2,700                         | Piles are exposed to rainfall and uncovered.                                                                                                    |
|             |                                                                                                                                                                                                                                                                                         | Mixture of animal bedding and yard waste (composting material)        |                               |                                                                                                                                                 |
|             |                                                                                                                                                                                                                                                                                         | Post Treatment Compost (aged biosolids and composting material mixed) |                               |                                                                                                                                                 |
| Facility 2  | 1:2 Ratio of biosolids to yard waste. Windrows are left outside to weather for 45 days where internal temperatures can reach 60° C. Windrows are covered by an awning to shield the mixtures from rain. Piles are screened to ¾ inch when aging is completed.                           | Biosolids prior to mixing                                             | 4,000                         | Piles of raw and final product are left uncovered outside but after mixing the aging process is done on a covered surface.                      |
|             |                                                                                                                                                                                                                                                                                         | Mixture of animal bedding and yard waste (composting material)        |                               |                                                                                                                                                 |
|             |                                                                                                                                                                                                                                                                                         | Biosolids prior to mixing                                             |                               |                                                                                                                                                 |
| Facility 3  | Biosolids are solar dried for 14 days going from ~12% solids to ~60%. Then biosolids go into a natural gas thermal chamber for pasteurization at 90 -120° C for 2 hours and exit at a ~90% solids content.                                                                              | Pre-heat treatment biosolids                                          | 2,700                         | Accepts biosolids from multiple wastewater treatment plants (WWTP) but samples were collected from the same WWTP pre and post - heat treatment. |
|             |                                                                                                                                                                                                                                                                                         | Post – heat treatment biosolids                                       |                               |                                                                                                                                                 |

| Sample name | Treatment description                                                                                                                                                                                                                         | Samples collected               | Dry tonnes produced each year | Notes                                                                                                                                           |
|-------------|-----------------------------------------------------------------------------------------------------------------------------------------------------------------------------------------------------------------------------------------------|---------------------------------|-------------------------------|-------------------------------------------------------------------------------------------------------------------------------------------------|
| Facility 4  | Wet cake is centrifuged before entering a natural gas fueled dryer drum. Hot air is passed over the biosolids (90 -120° C) until they reach ~90% solids content and exit the drum via a cyclone separator.                                    | Pre-heat treatment biosolids    | 20,000                        | Accepts biosolids from multiple WWTPs but samples collected were a blend of all biosolids processed for that day pre and post - heat treatment. |
|             |                                                                                                                                                                                                                                               | Post – heat treatment biosolids |                               |                                                                                                                                                 |
| Facility 5  | Dewatered sludge is mechanically mixed with CaO (quicklime) until a pH of 12 is reached. Sulphamic acid is added to the mix to increase pH and the temperature to 60° C for a forty-minute retention time.                                    | Pre-Lime treatment biosolids    | 8,200                         | This is the only facility where the final product is a liquid biosolid.                                                                         |
|             |                                                                                                                                                                                                                                               | Post-Lime treatment biosolids   |                               |                                                                                                                                                 |
| Facility 6  | Lime is added as a stabilizing agent (pH < 12) while biosolids are dried by a combination of solar and a natural gas burner to reach a 90% solids content.                                                                                    | Pre-Lime amended biosolids      | 4,500                         | Uses a natural gas burner to treat biosolids after lime addition.                                                                               |
|             |                                                                                                                                                                                                                                               | Post-Lime amended biosolids     |                               |                                                                                                                                                 |
| Facility 7  | Belt filter pressed biosolids are fed into a two stage digester: mesophilic (35°C)/thermophilic(50°C) for a retention time of ~ 20 days. Post digestion biosolids are then dried by a belt filter press to reach 40% solids content.          | Pre- Anaerobic Treatment        | 6,300                         | Uses a belt press to dry the biosolids that have passed through the anaerobic digester.                                                         |
|             |                                                                                                                                                                                                                                               | Post- Anaerobic Treatment       |                               |                                                                                                                                                 |
| Facility 8  | Belt filter pressed biosolids are fed into a two stage digester: mesophilic(35°C)/thermophilic (50°C) for a retention time of ~ 20 days. Post digestion biosolids are then dried by natural gas burner (90 -120° C) until 90% solids content. | Pre- Anaerobic Treatment        | 11,000                        | Uses heat treatment to dry biosolids that have made it through the anaerobic digester.                                                          |
|             |                                                                                                                                                                                                                                               | Post- Anaerobic Treatment       |                               |                                                                                                                                                 |

## Section 2: Studies to characterize PFAS in biosolids

**Table S2** Table summarizing information from previous studies regarding PFAS analysis and results compared to this study.

| Author                           | # of biosolids | # of PFAA quantified | # of PFAA Precursors quantified | # of Species detected | Range of PFOS concentrations ng-g <sup>-1</sup> dry | Range of PFOA concentrations ng-g <sup>-1</sup> dry |
|----------------------------------|----------------|----------------------|---------------------------------|-----------------------|-----------------------------------------------------|-----------------------------------------------------|
| This study                       | 16             | 20                   | 72                              | 25                    | 4.0 – 40                                            | 1.7 – 21                                            |
| Venkatesan , 2001                | 94             | 13                   | 0                               | 10                    | 308 – 618                                           | 12 – 70                                             |
| Sinclair, 2006                   | 6              | 11                   | 3                               | 14                    | < LOD – 65                                          | 18 – 241                                            |
| Shultz, 2006                     | 1              | 11                   | 4                               | 15                    | 81 – 160                                            | 8 – 15                                              |
| Loganathan, 2007                 | 2              | 8                    | 0                               | 8                     | 8 – 110                                             | 16 – 219                                            |
| Yu, 2009                         | 2              | 2                    | 0                               | 2                     | 31 – 702                                            | 18 – 69                                             |
| Yoo, 2009                        | 3              | 10                   | 0                               | 10                    | 32 – 418                                            | 20 – 128                                            |
| D’eon, 2009                      | 6              | 5                    | 8                               | 13                    | .1 – 460                                            | .1 – 3.9                                            |
| Navarro, 2016                    | 16             | 17                   | 3                               | 9                     | < LOD – 84                                          | <LOD – 14                                           |
| Lazcano, 2019                    | 4              | 17<br>30*            | 0                               | 20                    | 6 – 14                                              | 0.7 – 1.3                                           |
| Gallen, 2016                     | 14             | 9                    | 0                               | 9                     | 10 – 370                                            | .26 – 30                                            |
| Erikson, 2015                    | 3              | 24                   | 20                              | 40                    | .2 – 8.1                                            | < LOD – 2.9                                         |
| Sepulvado, 2011                  | 6              | 14                   | 2                               | 16                    | 80 – 219                                            | 8 - 68                                              |
| (EGLE), 2020<br>*Lower impacted  | 35             | 18                   | 6                               | 22                    | 3 – 90                                              | < LOD – 18                                          |
| (EGLE), 2020<br>*Higher impacted | 7              | 18                   | 6                               | 22                    | 1,060 – 2,150                                       | < LOD – 5                                           |
| Schaefer, 2022                   | 7              | 18                   | 34                              | 39                    | 0.8 – 8.1                                           | 0.4 – 150                                           |
| Moodie, 2021                     | 19             | 20                   | 24                              | 34                    | 0.9 – 193                                           | <0.3 – 45                                           |

\*In the Lazcano study 30 additional PFAA-precursors underwent screening for identification.

### Section 3: Instrumentation analysis

A Gemini C18 (100 x 2 mm; 3 $\mu$ m) column from Phenomenex was used for chromatographic separation. Water [A] and methanol [B] both containing 5 mM of ammonium acetate were used as the mobile phase. The gradient elution was set as 0-3 min 10% B, 3-4.5 min 10-35% B, 4.5-12.5 min 35-95% B, 12.5-12.51 min 95-99 % B, 12.51-19 min 99%, and then equilibrated to initial conditions in 30 min. The temperature of the autosampler was 4 °C, the flow rate was 0.5 mL min<sup>-1</sup>, and injection volume was 10  $\mu$ L. Water, methanol, and ammonium acetate used in the study were all Optimal grade purchased from Fisher Scientific. Scheduled selected reaction monitoring scan (SRM) mode (monitoring two transitions, if possible) was used to detect and quantify each PFAS compound (native and mass-labeled species are shown in Table S3.0). The most intense transition was used for quantification, while the second transition was used to confirm identification (if applicable). Table S3.1 displays additional LC/MS/MS parameters while Table S3.2 displays the mass spectrometric scan parameters (and transitions) for all targeted analytes.

For quantification, a calibration curve that ranged from 10 ng L<sup>-1</sup> to 100,000 ng L<sup>-1</sup> (14 levels) was developed for all 51 PFAS through serial gravimetrically-weighted dilutions of primary stock solutions. Calibration information for each PFAS was derived and tailored using the prepared calibration levels. A mixture of 24 mass-labeled PFAS internal standards (see Table S3.0) at concentrations of ~ 800 ng L<sup>-1</sup> was also added to each calibration level. All PFAS standards were purchased from Wellington Laboratories Inc. (Guelph, ON, Canada). The most intense transition was used for quantification.

The methodological limit of detection (LOD) and limit of quantification (LOQ) were defined as the peak area of analyte that yielded a signal-to-noise (S/N) ratio of 3 and 10, respectively. Since the original 17 mL sample was extracted and evaporated to 5 mL for analysis, the LOD and LOQ of each original sample was determined using the LOD and LOQ of the instrument multiplied by the ratio between the final volume of extract being analyzed (5 mL) and the original volume of each leachate sample (17 mL). Table S4.8 shows the extraction efficiencies of each reported compound.



**Table S3** Acronyms and structures of PFAS and the corresponding internal standard (IS) used for quantitation (concentration in the stock solution shown). When no mass-labeled compound is available, the mass-labeled compound with the closest retention time was selected.

| Type          | Group                                  | Acronyms                             | Internal Standards | Internal Standards Concentrations (ng g <sup>-1</sup> ) | Structure                                                                           |
|---------------|----------------------------------------|--------------------------------------|--------------------|---------------------------------------------------------|-------------------------------------------------------------------------------------|
| Terminal PFAS | Perfluoroalkyl carboxylic acids (PFCA) | PFBA (n+1=4)                         | M4PFBA             | 22.1                                                    | 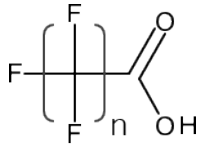 |
|               |                                        | PFPeA (n+1=5)                        | M5PFPeA            | 22.1                                                    |                                                                                     |
|               |                                        | PFHxA (n+1=6)                        | M5PFHxA            | 22.1                                                    |                                                                                     |
|               |                                        | PFHpA (n+1=7)                        | M4PFHpA            | 22.1                                                    |                                                                                     |
|               |                                        | PFOA (n+1=8)                         | M8PFOA             | 22.1                                                    |                                                                                     |
|               |                                        | PFNA (n+1=9)                         | M9PFNA             | 22.1                                                    |                                                                                     |
|               |                                        | PFDA (n+1=10)                        | M6PFDA             | 22.1                                                    |                                                                                     |
|               |                                        | PFUnDA (n+1=11)                      | M7PFUnDA           | 22.1                                                    |                                                                                     |
|               |                                        | PFDoDA (n+1=12)                      | MPFDoDA            | 22.1                                                    |                                                                                     |
|               |                                        | *PFTrDA (n+1=13)                     | d5-N-EtFOSA-M      | 111                                                     |                                                                                     |
|               |                                        | PFTeDA (n+1=14)                      | M2PFTeDA           | 22.1                                                    |                                                                                     |
|               |                                        | *PFHxDA (n+1=16)                     | M2PFTeDA           | 22.1                                                    |                                                                                     |
|               |                                        | *PFOA (n+1=18)                       | M2PFTeDA           | 22.1                                                    |                                                                                     |
|               |                                        | Perfluoroalkyl sulfonic acids (PFSA) | PFPrS (n=3)        | M5PFPeA                                                 |                                                                                     |
|               | PFBS (n=4)                             |                                      | M3PFBS             | 20.5                                                    |                                                                                     |
|               | *PFPeS (n=5)                           |                                      | M3HFPO-DA          | 111                                                     |                                                                                     |
|               | *PFHxS (n=6)                           |                                      | M3HFPO-DA          | 111                                                     |                                                                                     |
|               | *PFHpS (n=7)                           |                                      | M2-6:2FTS          | 21.0                                                    |                                                                                     |
|               | PFOS (n=8)                             |                                      | M8PFOS             | 21.2                                                    |                                                                                     |
|               | *PFNS (n=9)                            |                                      | M2-8:2FTS          | 21.2                                                    |                                                                                     |
| *PFDS (n=10)  | d5-N-EtFOSAA                           |                                      | 22.1               |                                                         |                                                                                     |

| Type                                                 | Group                                              | Acronyms                                           | Internal Standards | Internal Standards Concentrations (ng g <sup>-1</sup> ) | Structure                                                                             |
|------------------------------------------------------|----------------------------------------------------|----------------------------------------------------|--------------------|---------------------------------------------------------|---------------------------------------------------------------------------------------|
|                                                      |                                                    | *PFDoDS (n=12)                                     | MPFDoDA            | 22.1                                                    |                                                                                       |
| PFAA-precursors                                      | Fluorotelomer sulfonic acids                       | 4:2 FTS (n=4)                                      | M2-4:2FTS          | 20.7                                                    | 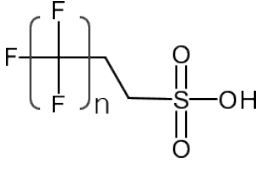   |
|                                                      |                                                    | 6:2 FTS (n=6)                                      | M2-6:2FTS          | 21.0                                                    |                                                                                       |
|                                                      |                                                    | 8:2 FTS (n=8)                                      | M2-8:2FTS          | 21.2                                                    |                                                                                       |
|                                                      |                                                    | *10:2 FTS (n=10)                                   | MPFDoDA            | 22.1                                                    |                                                                                       |
|                                                      | Saturated fluorotelomer carboxylic acids (FTCA)    | *FHEA or 6:2 FTCA (n=6)                            | M4PFHpA            | 22.1                                                    |    |
|                                                      |                                                    | FPePA or 5:3 FTCA (n=5)                            | MFOEA              | 23.0                                                    |                                                                                       |
|                                                      |                                                    | FHpPA or 7:3 FTCA (n=7)                            |                    |                                                         |                                                                                       |
|                                                      |                                                    | FOEA or 8:2 FTCA (n=8)                             |                    |                                                         |                                                                                       |
|                                                      |                                                    | *FDEA or 10:2 FTCA (n=10)                          | M7PFUnDA           | 22.1                                                    |                                                                                       |
|                                                      | Unsaturated fluorotelomer carboxylic acids (FTUCA) | *FOUEA or 8:2 FTUCA (n=7)                          | MFOEA              | 23.0                                                    |  |
|                                                      |                                                    | *FDUEA or 10:2 FTUCA (n=9)                         | M7PFUnDA           | 22.1                                                    |                                                                                       |
|                                                      | Perfluoroalkane sulfonamido substances             | *FBSA (n=4, R <sup>1</sup> =H, R <sup>2</sup> =H)  | M3PFBS             | 20.5                                                    |  |
|                                                      |                                                    | *FHxSA (n=6, R <sup>1</sup> =H, R <sup>2</sup> =H) | M3PFHxS            | 20.9                                                    |                                                                                       |
| *AP-FHxSA (n=6, R <sup>1</sup> =H, R <sup>2</sup> =) |                                                    | M2-6:2FTS                                          | 21.0               |                                                         |                                                                                       |

| Type       | Group                                          | Acronyms                                                                                                                                    | Internal Standards | Internal Standards Concentrations (ng g <sup>-1</sup> ) | Structure |
|------------|------------------------------------------------|---------------------------------------------------------------------------------------------------------------------------------------------|--------------------|---------------------------------------------------------|-----------|
|            |                                                | $\begin{array}{c} \text{H} & \text{H} & \text{H} \\   &   &   \\ \text{---} & & \\   &   &   \\ \text{H} & \text{H} & \text{H} \end{array}$ |                    |                                                         |           |
|            |                                                | FOSA (n=8, R <sup>1</sup> =H, R <sup>2</sup> =H)                                                                                            | M8FOSA             | 22.1                                                    |           |
|            |                                                | MeFOSA (n=8, R <sup>1</sup> =H, R <sup>2</sup> =CH <sub>3</sub> )                                                                           | d3-N-MeFOSA-M      | 118                                                     |           |
|            |                                                | EtFOSA (n=8, R <sup>1</sup> =H, R <sup>2</sup> =C <sub>2</sub> H <sub>5</sub> )                                                             | d5-N-EtFOSA-M      | 111                                                     |           |
|            |                                                | *FOSAA (n=8, R <sup>1</sup> =CH <sub>2</sub> COOH, R <sup>2</sup> =H)                                                                       | M2-8:2FTS          | 21.2                                                    |           |
|            |                                                | MeFOSAA (n=8, R <sup>1</sup> =CH <sub>2</sub> COOH, R <sup>2</sup> =CH <sub>3</sub> )                                                       | d3-N-MeFOSAA       | 22.1                                                    |           |
|            |                                                | EtFOSAA (n=8, R <sup>1</sup> =COOH, R <sup>2</sup> =C <sub>2</sub> H <sub>5</sub> )                                                         | d5-N-EtFOSAA       | 22.1                                                    |           |
|            | Perfluoroalkyl phosphinic acids (PFPi)         | *6:6 PFPi (m=6, n=6)                                                                                                                        | MPFDoDA            | 22.1                                                    |           |
|            |                                                | *6:8 PFPi (m=6, n=8)                                                                                                                        | M2PFTeDA           | 22.1                                                    |           |
|            | Polyfluoroalkyl phosphate diester (diPAP)      | *6:2 diPAP (m=6, n=6)                                                                                                                       | M2PFTeDA           | 22.1                                                    |           |
|            |                                                | *8:2 diPAP (m=8, n=8)                                                                                                                       | M2PFTeDA           | 22.1                                                    |           |
|            |                                                | *6:2/8:2 diPAP (m=6, n=8)                                                                                                                   | M2PFTeDA           | 22.1                                                    |           |
|            | Polyfluorooctane sulfonamide phosphate diester | *diSAmPA P                                                                                                                                  | M2PFTeDA           | 22.1                                                    |           |
| Other PFAS | Chloro-perfluorooctane sulfonic acids          | *8Cl-PFOS                                                                                                                                   | M8PFOS             | 21.2                                                    |           |

| Type | Group                                    | Acronyms                                                    | Internal Standards | Internal Standards Concentrations (ng g <sup>-1</sup> ) | Structure                                                                             |
|------|------------------------------------------|-------------------------------------------------------------|--------------------|---------------------------------------------------------|---------------------------------------------------------------------------------------|
|      | Polyfluoroether sulfonic acids (PFESAs)  | *9Cl-PF3ONS or 6:2 Cl-PFESA (n=6, trade name F-53B major)   | M2-8:2FTS          | 21.2                                                    | 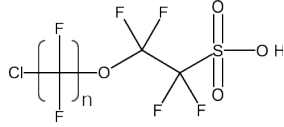   |
|      |                                          | *11Cl-PF3OUdS or 8:2 Cl-PFESA (n=8, trade name F-53B minor) | d5-N-EtFOSAA       | 22.1                                                    |                                                                                       |
|      | Perfluoroether carboxylic acids (PFECAs) | *NaDONA                                                     | M4PFHpA            | 22.1                                                    |   |
|      | Cyclic perfluorinated acid               | *PFECHS                                                     | M2-6:2FTS          | 21.0                                                    |  |
|      | Perfluorodimethyloctanoic acid           | Syn 35                                                      | MFOEA              | 23.0                                                    |  |
|      | Hexadecafluorononanoic acid              | Oak 10                                                      | M4PFHpA            | 22.1                                                    |  |

\*- the isotopically labeled standard is either not available or had poor response. The isotopically labeled standard that was similar by structure or retention time (or provided the most stable response within the batch) was selected.



**Table S4** LC/MS/MS operation conditions

| Mass Spectrometry Analysis – Thermo Quantis                  |                                                                                    |
|--------------------------------------------------------------|------------------------------------------------------------------------------------|
| Ion Source Parameters                                        | Electrospray – Negative Mode                                                       |
|                                                              | Ion Spray: 1500 V                                                                  |
|                                                              | Sheath Gas: 50 Arb                                                                 |
|                                                              | Auxiliary Gas: 10 Arb                                                              |
|                                                              | Ion Transfer Tube Temperature: 250 °C                                              |
|                                                              | Vaporizer Temperature: 550 °C                                                      |
| Chromatography Conditions – Thermo Scientific Vanquish UHPLC |                                                                                    |
| LC Conditions                                                | Column: Gemini Phenomenex 100 x 2 mm 3µm                                           |
|                                                              | Gradient Elution using Water and Methanol both containing 5 mM of ammonium acetate |
|                                                              | Oven Temperature 40 °C                                                             |
|                                                              | Flow Rate: 0.5 mL min <sup>-1</sup>                                                |
|                                                              | Injection Volume: 10 µL                                                            |

**Table S5** LC/MS/MS parameters for targeted analysis.

| <b>Analytes</b> | <b>Precursor Ion<br/>(<i>m/z</i>)</b> | <b>Fragment Ion<br/>(<i>m/z</i>)</b> | <b>Collision Energy<br/>(V)</b> | <b>RF Lens<br/>(V)</b> |
|-----------------|---------------------------------------|--------------------------------------|---------------------------------|------------------------|
| PFBA            | 213                                   | 169                                  | 11                              | 75                     |
| M3PFBA          | 216                                   | 172                                  | 11                              | 75                     |
| M4PFBA          | 217                                   | 172                                  | 11                              | 75                     |
| L-PFPrS-1       | 249                                   | 80                                   | 29                              | 138                    |
| L-PFPrS-2       | 249                                   | 99                                   | 26                              | 138                    |
| PFPeA           | 263                                   | 219                                  | 11                              | 64                     |
| M5PFPeA         | 268                                   | 223                                  | 11                              | 64                     |
| FBSA-1          | 298                                   | 78                                   | 25                              | 144                    |
| FBSA-2          | 298                                   | 119                                  | 18                              | 144                    |
| L-PFBS-1        | 299                                   | 80                                   | 32                              | 152                    |
| L-PFBS-2        | 299                                   | 99                                   | 28                              | 152                    |
| M3PFBS          | 302                                   | 99                                   | 29                              | 152                    |
| PFHxA           | 313                                   | 269                                  | 10                              | 73                     |
| M5PFHxA         | 318                                   | 273                                  | 10                              | 73                     |
| 4:2FTS-2        | 327                                   | 81                                   | 29                              | 138                    |
| 4:2FTS-1        | 327                                   | 307                                  | 18                              | 138                    |
| M2-4:2FTS       | 329                                   | 81                                   | 18                              | 138                    |
| HFPO-DA         | 329                                   | 285                                  | 7                               | 65                     |
| M3HFPO-DA       | 332                                   | 287                                  | 7                               | 65                     |
| FPePA           | 341                                   | 217                                  | 23                              | 122                    |
| PFPeS-1         | 349                                   | 80                                   | 34                              | 174                    |
| PFPeS-2         | 349                                   | 99                                   | 31                              | 174                    |

| <b>Analytes</b> | <b>Precursor Ion<br/>(<i>m/z</i>)</b> | <b>Fragment Ion<br/>(<i>m/z</i>)</b> | <b>Collision Energy<br/>(V)</b> | <b>RF Lens<br/>(V)</b> |
|-----------------|---------------------------------------|--------------------------------------|---------------------------------|------------------------|
| PFHpA-1         | 363                                   | 169                                  | 17                              | 81                     |
| PFHpA-2         | 363                                   | 319                                  | 11                              | 81                     |
| M4PFHpA         | 367                                   | 322                                  | 11                              | 81                     |
| FHEA            | 377                                   | 293                                  | 20                              | 100                    |
| NaDONA          | 377                                   | 251                                  | 10                              | 280                    |
| FHxSA-1         | 398                                   | 78                                   | 28                              | 185                    |
| FHxSA-2         | 398                                   | 378                                  | 20                              | 185                    |
| L-PFHxS-2       | 399                                   | 80                                   | 37                              | 174                    |
| L-PFHxS-1       | 399                                   | 99                                   | 35                              | 174                    |
| M3PFHxS         | 402                                   | 99                                   | 35                              | 151                    |
| PFOA-1          | 413                                   | 169                                  | 19                              | 94                     |
| PFOA-2          | 413                                   | 369                                  | 11                              | 94                     |
| M2PFOA          | 415                                   | 370                                  | 11                              | 94                     |
| M8PFOA          | 421                                   | 376                                  | 11                              | 94                     |
| 6:2FTS-2        | 427                                   | 81                                   | 30                              | 166                    |
| 6:2FTS-1        | 427                                   | 407                                  | 21                              | 166                    |
| M2-6:2FTS-2     | 429                                   | 81                                   | 21                              | 166                    |
| M2-6:2FTS-1     | 429                                   | 376                                  | 21                              | 166                    |
| FHpPA           | 441                                   | 316                                  | 20                              | 148                    |
| Oak 10          | 445                                   | 381                                  | 11                              | 120                    |
| PFHpS-1         | 449                                   | 80                                   | 39                              | 223                    |
| PFHpS-2         | 449                                   | 99                                   | 38                              | 223                    |



| <b>Analytes</b>           | <b>Precursor Ion<br/>(<i>m/z</i>)</b> | <b>Fragment Ion<br/>(<i>m/z</i>)</b> | <b>Collision Energy<br/>(V)</b> | <b>RF Lens<br/>(V)</b> |
|---------------------------|---------------------------------------|--------------------------------------|---------------------------------|------------------------|
| FOUEA                     | 457                                   | 393                                  | 12                              | 100                    |
| PFECHS-2                  | 461                                   | 99                                   | 29                              | 171                    |
| PFECHS-1                  | 461                                   | 381                                  | 26                              | 171                    |
| PFNA-1                    | 463                                   | 219                                  | 16                              | 101                    |
| PFNA-2                    | 463                                   | 419                                  | 12                              | 101                    |
| M9PFNA                    | 472                                   | 427                                  | 12                              | 101                    |
| FOEA                      | 477                                   | 393                                  | 18                              | 100                    |
| MFOEA-1                   | 479                                   | 394                                  | 11                              | 107                    |
| N-AP-FH <sub>x</sub> SA-1 | 483                                   | 169                                  | 27                              | 244                    |
| N-AP-FH <sub>x</sub> SA-2 | 483                                   | 319                                  | 22                              | 244                    |
| FOSA-I-1                  | 498                                   | 78                                   | 30                              | 206                    |
| FOSA-I-2                  | 498                                   | 478                                  | 23                              | 206                    |
| L-PFOS-1                  | 499                                   | 80                                   | 40                              | 214                    |
| L-PFOS-2                  | 499                                   | 99                                   | 41                              | 214                    |
| MPFOS-2                   | 503                                   | 80                                   | 42                              | 266                    |
| MPFOS-1                   | 503                                   | 99                                   | 42                              | 266                    |
| M8FOSA-I-2                | 503                                   | 80                                   | 30                              | 196                    |
| M8FOSA-I-1                | 503                                   | 486                                  | 23                              | 196                    |
| M8PFOS-1                  | 507                                   | 80                                   | 44                              | 259                    |
| M8PFOS-2                  | 507                                   | 99                                   | 44                              | 259                    |
| N-MeFOSA-M-2              | 512                                   | 169                                  | 26                              | 187                    |
| N-MeFOSA-M-1              | 512                                   | 219                                  | 24                              | 187                    |
| PFDA                      | 513                                   | 469                                  | 11                              | 94                     |

| <b>Analytes</b>     | <b>Precursor Ion<br/>(m/z)</b> | <b>Fragment Ion<br/>(m/z)</b> | <b>Collision Energy<br/>(V)</b> | <b>RF Lens<br/>(V)</b> |
|---------------------|--------------------------------|-------------------------------|---------------------------------|------------------------|
| Syn 35              | 513                            | 469                           | 8                               | 113                    |
| 8Cl-PFOS-1          | 515                            | 80                            | 41                              | 273                    |
| 8Cl-PFOS-2          | 515                            | 99                            | 40                              | 273                    |
| d3-N-MeFOSA-M-<br>2 | 515                            | 169                           | 26                              | 194                    |
| d3-N-MeFOSA-M-<br>1 | 515                            | 219                           | 24                              | 194                    |
| MPFDA               | 515                            | 470                           | 11                              | 94                     |
| M6PFDA              | 519                            | 474                           | 11                              | 94                     |
| N-EtFOSA-M-2        | 526                            | 169                           | 27                              | 209                    |
| N-EtFOSA-M-1        | 526                            | 219                           | 24                              | 209                    |
| 8:2 FTS-2           | 527                            | 487                           | 31                              | 179                    |
| 8:2 FTS-1           | 527                            | 507                           | 25                              | 179                    |
| M2-8:2 FTS          | 529                            | 81                            | 25                              | 179                    |
| 9Cl-PF3ONS-1        | 531                            | 351                           | 25                              | 155                    |
| d5-N-EtFOSA-M-3     | 531                            | 169                           | 27                              | 203                    |
| d5-N-EtFOSA-M-2     | 531                            | 219                           | 25                              | 203                    |
| L-PFNS-1            | 549                            | 80                            | 43                              | 280                    |
| L-PFNS-2            | 549                            | 99                            | 43                              | 280                    |
| FOSAA-2             | 556                            | 419                           | 23                              | 210                    |
| FOSAA-1             | 556                            | 498                           | 26                              | 210                    |
| FDUEA               | 557                            | 493                           | 21                              | 280                    |
| PFUnDA              | 563                            | 519                           | 11                              | 116                    |

| <b>Analytes</b>         | <b>Precursor Ion<br/>(<i>m/z</i>)</b> | <b>Fragment Ion<br/>(<i>m/z</i>)</b> | <b>Collision Energy<br/>(V)</b> | <b>RF Lens<br/>(V)</b> |
|-------------------------|---------------------------------------|--------------------------------------|---------------------------------|------------------------|
| N-MeFOSAA-1             | 570                                   | 419                                  | 18                              | 178                    |
| N-MeFOSAA-2             | 570                                   | 483                                  | 14                              | 178                    |
| M7PFUnDA-2              | 570                                   | 525                                  | 11                              | 116                    |
| d3-N-MeFOSAA-1          | 573                                   | 419                                  | 19                              | 174                    |
| d3-N-MeFOSAA-2          | 573                                   | 483                                  | 14                              | 174                    |
| FDEA                    | 577                                   | 493                                  | 8                               | 100                    |
| N-EtFOSAA-2             | 584                                   | 419                                  | 19                              | 179                    |
| N-EtFOSAA-1             | 584                                   | 526                                  | 18                              | 179                    |
| d5-N-EtFOSAA-2          | 589                                   | 419                                  | 19                              | 176                    |
| d5-N-EtFOSAA-1          | 589                                   | 531                                  | 19                              | 176                    |
| L-PFDS-1                | 599                                   | 80                                   | 45                              | 280                    |
| L-PFDS-2                | 599                                   | 99                                   | 47                              | 280                    |
| PFD <sub>o</sub> DA-2   | 613                                   | 319                                  | 18                              | 129                    |
| PFD <sub>o</sub> DA-1   | 613                                   | 569                                  | 10                              | 129                    |
| MPFD <sub>o</sub> DA    | 615                                   | 570                                  | 10                              | 129                    |
| 10:2 FTS-2              | 627                                   | 81                                   | 34                              | 280                    |
| 10:2 FTS-1              | 627                                   | 607                                  | 29                              | 280                    |
| 11Cl-PF3OUdS            | 631                                   | 451                                  | 27                              | 225                    |
| SAmPAP-1                | 650                                   | 526                                  | 25                              | 280                    |
| PFT <sub>r</sub> DA-2   | 663                                   | 319                                  | 19                              | 136                    |
| PFT <sub>r</sub> DA-1   | 663                                   | 619                                  | 11                              | 136                    |
| L-PFD <sub>o</sub> DS-1 | 699                                   | 80                                   | 55                              | 280                    |
| L-PFD <sub>o</sub> DS-3 | 699                                   | 99                                   | 55                              | 280                    |

| <b>Analytes</b> | <b>Precursor Ion<br/>(<i>m/z</i>)</b> | <b>Fragment Ion<br/>(<i>m/z</i>)</b> | <b>Collision Energy<br/>(V)</b> | <b>RF Lens<br/>(V)</b> |
|-----------------|---------------------------------------|--------------------------------------|---------------------------------|------------------------|
| 6:6 PFPi        | 701                                   | 401                                  | 55                              | 188                    |
| PFTeDA          | 713                                   | 669                                  | 12                              | 107                    |
| M2PFTeDA        | 715                                   | 670                                  | 12                              | 107                    |
| 6:2 diPAP-2     | 789                                   | 97                                   | 29                              | 216                    |
| 6:2 diPAP-1     | 789                                   | 443                                  | 17                              | 216                    |
| 6:8 PFPi-2      | 801                                   | 401                                  | 55                              | 188                    |
| 6:8 PFPi-1      | 801                                   | 50                                   | 55                              | 188                    |
| PFHxDA-2        | 813                                   | 419                                  | 20                              | 167                    |
| PFHxDA-1        | 813                                   | 769                                  | 12                              | 167                    |
| 6:2/8:2 diPAP   | 889                                   | 443                                  | 20                              | 280                    |
| PFODA-2         | 913                                   | 319                                  | 25                              | 188                    |
| PFODA-1         | 913                                   | 869                                  | 13                              | 188                    |
| 8:2 diPAP-2     | 989                                   | 523                                  | 27                              | 280                    |
| 8:2 diPAP       | 989                                   | 543                                  | 20                              | 280                    |
| diSAmPAP        | 1203                                  | 526                                  | 25                              | 280                    |

\*-1 indicates the first transition of the analyte, and -2 indicates the second transition of the analyte; the first transition and the second transition were used for quantitation and confirmation, respectively.

## Section 4: Results and Extraction Efficiency

**Table S6** Summary results of PFAS concentrations in biosolid processing Facility 1

| Compound     | Facility 1 Before Treatment |                    | Facility 1 After Treatment |                    |
|--------------|-----------------------------|--------------------|----------------------------|--------------------|
|              | Mean ng/g dry               | Standard deviation | Mean ng/g dry              | Standard deviation |
| PFPeA        | 3.7                         | 0.121              | 17                         | 0.883              |
| PFBS         | 0.0                         | N/A                | 3.3                        | 0.997              |
| PFHxA        | 6.9                         | 0.107              | 15                         | 0.519              |
| PFHpA        | 0.0                         | N/A                | 0.0                        | N/A                |
| Oak 10       | 0.0                         | N/A                | 0.0                        | N/A                |
| FPePA        | 17                          | 0.158              | 2.0                        | 0.181              |
| 6:2FTS       | 0.0                         | N/A                | 2.7                        | 0.298              |
| PFOA         | 20                          | 0.203              | 4.7                        | 0.104              |
| PFOS         | 41                          | 0.509              | 2.1                        | 0.193              |
| PFNA         | 4.5                         | 0.078              | 0.60                       | 0.016              |
| Syn35        | 0.0                         | N/A                | 0.0                        | N/A                |
| 8:2FTS       | 0.0                         | N/A                | 0.30                       | 0.028              |
| PFUdA        | 3.3                         | 0.071              | 0.47                       | 0.064              |
| 6:2diPAP     | 57                          | 1.227              | 4.2                        | 0.582              |
| 6:2/8:2diPAP | 58                          | 0.954              | 5.9                        | 1.169              |
| 8:2 diPAP    | 83                          | 1.220              | 6.0                        | 0.497              |
| diSamPAP     | 0.47                        | 0.019              | 0.08                       | 0.005              |
| FHEA         | 0.0                         | N/A                | 0.0                        | N/A                |
| FHpPA        | 0.24                        | 0.002              | 0.038                      | 0.003              |
| FOSAA        | 64                          | 0.544              | 6.5                        | 1.145              |
| PFDA         | 30                          | 0.310              | 4.1                        | 0.120              |
| N-MeFOSAA    | 11                          | 0.120              | 1.6                        | 0.119              |
| N-EtFOSAA    | 4.0                         | 0.084              | 1.0                        | 0.048              |
| PFDoA        | 4.1                         | 0.034              | 1.0                        | 0.090              |
| PFTeDA       | 1.5                         | 0.011              | 0.28                       | 0.008              |
| Total PFAS   | 408.9                       |                    | 78.8                       |                    |

**Table S7** Summary results of PFAS concentrations in biosolid processing Facility 2

| Compound     | Facility 2 Before Treatment |                    | Facility 2 compost After Treatment |                    |
|--------------|-----------------------------|--------------------|------------------------------------|--------------------|
|              | Mean ng/g dry               | Standard deviation | Mean ng/g dry                      | Standard deviation |
| PFPeA        | 2.7                         | 0.057              | 26                                 | 7.088              |
| PFBS         | 2.9                         | 0.484              | 1.3                                | 0.456              |
| PFHxA        | 3.9                         | 0.131              | 13                                 | 0.823              |
| PFHpA        | 0.0                         | N/A                | 0.68                               | 0.175              |
| Oak 10       | 0.32                        | 0.036              | 0.0                                | N/A                |
| FPePA        | 25                          | 1.110              | 2.7                                | 0.302              |
| 6:2FTS       | 0.15                        | 0.012              | 2.6                                | 0.279              |
| PFOA         | 4.9                         | 0.039              | 6.8                                | 0.128              |
| PFOS         | 4.2                         | 0.428              | 2.6                                | 0.011              |
| PFNA         | 0.92                        | 0.026              | 1.0                                | 0.043              |
| Syn35        | 0.0                         | N/A                | 4.9                                | 0.612              |
| 8:2FTS       | 1.0                         | 0.090              | 1.1                                | 0.082              |
| PFUdA        | 0.49                        | 0.008              | 0.76                               | 0.026              |
| 6:2diPAP     | 48                          | 1.954              | 28                                 | 1.621              |
| 6:2/8:2diPAP | 52                          | 3.124              | 27                                 | 3.598              |
| 8:2 diPAP    | 52                          | 4.106              | 23                                 | 2.919              |
| diSamPAP     | 0.24                        | 0.029              | 0.094                              | 0.016              |
| FHEA         | 0.0                         | N/A                | 0.0                                | N/A                |
| FHpPA        | 0.43                        | 0.007              | 0.039                              | 0.002              |
| FOSAA        | 9.3                         | 1.439              | 20                                 | 3.764              |
| PFDA         | 13                          | 0.488              | 10                                 | 0.607              |
| N-MeFOSAA    | 1.8                         | 0.078              | 3.1                                | 0.232              |
| N-EtFOSAA    | 1.2                         | 0.034              | 1.2                                | 0.116              |
| PFDoA        | 1.5                         | 0.167              | 1.8                                | 0.199              |
| PFTeDA       | 0.33                        | 0.007              | 0.40                               | 0.049              |
| Total PFAS   | 227.3                       |                    | 177.8                              |                    |

**Table S8** Summary results of PFAS concentrations in biosolid processing Facility 3

| Compound     | Facility 3 Treatment |                    | Facility 3 Treatment |                    |
|--------------|----------------------|--------------------|----------------------|--------------------|
|              | Mean ng/g dry        | Standard deviation | Mean ng/g dry        | Standard deviation |
| PFPeA        | 3.1                  | 0.128              | 2.4                  | 0.344              |
| PFBS         | 4.2                  | 0.432              | 2.3                  | 0.438              |
| PFHxA        | 5.1                  | 0.132              | 4.5                  | 0.244              |
| PFHpA        | 1.1                  | 0.146              | 0.0                  | N/A                |
| Oak 10       | 0.0                  | N/A                | 0.0                  | N/A                |
| FPePA        | 130                  | 10.866             | 52                   | 2.679              |
| 6:2FTS       | 0.17                 | 0.019              | 0.84                 | 0.448              |
| PFOA         | 21                   | 0.823              | 7.7                  | 0.363              |
| PFOS         | 4.0                  | 1.398              | 1.4                  | 0.237              |
| PFNA         | 1.2                  | 0.118              | 1.1                  | 0.086              |
| Syn35        | 14                   | 0.410              | 10                   | 1.308              |
| 8:2FTS       | 0.34                 | 0.064              | 0.57                 | 0.062              |
| PFUdA        | 1.3                  | 0.013              | 1.0                  | 0.068              |
| 6:2diPAP     | 105                  | 0.343              | 200                  | 17.471             |
| 6:2/8:2diPAP | 50                   | 3.266              | 74                   | 22.531             |
| 8:2 diPAP    | 105                  | 5.262              | 86                   | 5.992              |
| diSamPAP     | 0.17                 | 0.011              | 0.20                 | 0.010              |
| FHEA         | 0.0                  | N/A                | 0.0                  | N/A                |
| FHpPA        | 1.0                  | 0.063              | 0.48                 | 0.008              |
| FOSAA        | 29                   | 1.471              | 27                   | 5.632              |
| PFDA         | 28                   | 1.358              | 18                   | 1.060              |
| N-MeFOSAA    | 4.6                  | 0.409              | 4.7                  | 0.289              |
| N-EtFOSAA    | 2.3                  | 0.109              | 2.9                  | 0.482              |
| PFDoA        | 7.3                  | 0.244              | 3.9                  | 0.351              |
| PFTeDA       | 0.85                 | 0.036              | 0.49                 | 0.043              |
| Total PFAS   | 519.1                |                    | 501.1                |                    |

**Table S9** Summary results of PFAS concentrations in biosolid processing Facility 4

| Compound     | Facility 4 Before Treatment |                    | Facility 4 After Treatment |                    |
|--------------|-----------------------------|--------------------|----------------------------|--------------------|
|              | Mean ng/g dry               | Standard deviation | Mean ng/g dry              | Standard deviation |
| PFPeA        | 1.3                         | 0.084              | 4.6                        | 0.712              |
| PFBS         | 11                          | 0.604              | 1.0                        | 0.139              |
| PFHxA        | 10                          | 0.182              | 2.2                        | 0.123              |
| PFHpA        | 0.0                         | N/A                | 0.0                        | N/A                |
| Oak 10       | 0.0                         | N/A                | 0.0                        | N/A                |
| FPePA        | 81                          | 1.415              | 18.6                       | 1.799              |
| 6:2FTS       | 0.46                        | 0.031              | 0.0                        | 0.025              |
| PFOA         | 4.3                         | 0.064              | 2.3                        | 0.121              |
| PFOS         | 33                          | 0.640              | 3.3                        | 1.076              |
| PFNA         | 2.0                         | 0.054              | 1.5                        | 0.055              |
| Syn35        | 0.0                         | N/A                | 5.1                        | 0.647              |
| 8:2FTS       | 1.4                         | 0.040              | 0.8                        | 0.075              |
| PFUdA        | 2.2                         | 0.051              | 1.3                        | 0.023              |
| 6:2diPAP     | 53                          | 0.461              | 261.2                      | 38.993             |
| 6:2/8:2diPAP | 81                          | 1.786              | 28                         | N/A                |
| 8:2 diPAP    | 73                          | 0.936              | 75.4                       | 2.970              |
| diSamPAP     | 0.32                        | 0.011              | 0.2                        | 0.008              |
| FHEA         | 0.0                         | N/A                | 0.0                        | N/A                |
| FHpPA        | 0.7                         | 0.011              | 0.17                       | 0.003              |
| FOSAA        | 40                          | 1.034              | 25                         | 0.793              |
| PFDA         | 9.1                         | 0.240              | 7.6                        | 0.364              |
| N-MeFOSAA    | 8.9                         | 0.261              | 6.0                        | 0.805              |
| N-EtFOSAA    | 5.0                         | 0.184              | 3.4                        | 0.213              |
| PFDoA        | 2.1                         | 0.087              | 2.4                        | 0.258              |
| PFTeDA       | 0.70                        | 0.028              | 0.5                        | 0.016              |
| Total PFAS   | 421.7                       |                    | 450.9                      |                    |



**Table S10** Summary results of PFAS concentrations in biosolid processing Facility 5

| Compound     | Facility 5 Before Treatment |                    | Facility 5 After Treatment |                    |
|--------------|-----------------------------|--------------------|----------------------------|--------------------|
|              | Mean ng/g dry               | Standard deviation | Mean ng/g dry              | Standard deviation |
| PFPeA        | 2.0                         | 0.186              | 0.0                        | N/A                |
| PFBS         | 1.7                         | 0.362              | 2.1                        | 0.201              |
| PFHxA        | 1.7                         | 0.136              | 2.1                        | 0.144              |
| PFHpA        | 0.0                         | N/A                | 0.0                        | N/A                |
| Oak 10       | 0.0                         | N/A                | 0.0                        | N/A                |
| FPePA        | 47                          | 0.920              | 29                         | 1.845              |
| 6:2FTS       | 0.20                        | 0.017              | 4.3                        | 0.198              |
| PFOA         | 1.7                         | 0.047              | 1.4                        | 0.008              |
| PFOS         | 4.4                         | 0.523              | 2.3                        | 0.201              |
| PFNA         | 0.49                        | 0.046              | 0.21                       | 0.007              |
| Syn35        | 0.0                         | N/A                | 0.0                        | N/A                |
| 8:2FTS       | 0.10                        | 0.011              | 0.0                        | N/A                |
| PFUdA        | 0.46                        | 0.014              | 0.33                       | 0.016              |
| 6:2diPAP     | 52                          | 1.280              | 28                         | 0.575              |
| 6:2/8:2diPAP | 24                          | 1.736              | 7.8                        | 0.135              |
| 8:2 diPAP    | 24                          | 1.502              | 5.9                        | 0.675              |
| diSamPAP     | 0.20                        | 0.018              | 0.14                       | 0.009              |
| FHEA         | 0.0                         | N/A                | 0.0                        | N/A                |
| FHpPA        | 0.45                        | 0.008              | 0.09                       | 0.002              |
| FOSAA        | 11                          | 0.453              | 22                         | 2.153              |
| PFDA         | 5.4                         | 0.169              | 3.2                        | 0.072              |
| N-MeFOSAA    | 2.9                         | 0.112              | 2.2                        | 0.122              |
| N-EtFOSAA    | 1.4                         | 0.115              | 0.0                        | N/A                |
| PFDoA        | 0.85                        | 0.062              | 0.38                       | 0.036              |
| PFTeDA       | 0.29                        | 0.016              | 0.26                       | 0.009              |
| Total PFAS   | 182.3                       |                    | 112                        |                    |

**Table S11** Summary results of PFAS concentrations in biosolid processing Facility 6

| Compound     | Facility 6 Before Treatment |                    | Facility 6 After Treatment |                    |
|--------------|-----------------------------|--------------------|----------------------------|--------------------|
|              | Mean ng/g dry               | Standard deviation | Mean ng/g dry              | Standard deviation |
| PFPeA        | 1.7                         | 0.165              | 3.8                        | 0.523              |
| PFBS         | 1.7                         | 0.128              | 0.0                        | N/A                |
| PFHxA        | 6.9                         | 0.543              | 4.5                        | 0.248              |
| PFHpA        | 0.61                        | 0.130              | 0.0                        | N/A                |
| Oak 10       | 0.0                         | N/A                | 0.0                        | N/A                |
| FPePA        | 83                          | 4.587              | 9.8                        | 0.211              |
| 6:2FTS       | 1.1                         | 0.226              | 2.4                        | 0.867              |
| PFOA         | 3.8                         | 0.183              | 3.2                        | 0.141              |
| PFOS         | 15                          | 4.224              | 19                         | 3.403              |
| PFNA         | 2.2                         | 0.100              | 0.44                       | 0.043              |
| Syn35        | 6.3                         | 0.587              | 4.7                        | 0.751              |
| 8:2FTS       | 1.4                         | 0.117              | 0.86                       | 0.199              |
| PFUdA        | 2.3                         | 0.085              | 0.65                       | 0.019              |
| 6:2diPAP     | 35                          | 2.449              | 245                        | 11.482             |
| 6:2/8:2diPAP | 62                          | 2.553              | 34                         | 2.068              |
| 8:2 diPAP    | 44                          | 1.075              | 19                         | 1.201              |
| diSamPAP     | 0.27                        | 0.033              | 0.22                       | 0.006              |
| FHEA         | 0.0                         | N/A                | 0.0                        | N/A                |
| FHpPA        | 0.61                        | 0.021              | 0.036                      | 0.002              |
| FOSAA        | 57                          | 7.544              | 26.0                       | 3.525              |
| PFDA         | 13                          | 0.671              | 5.9                        | 0.417              |
| N-MeFOSAA    | 12                          | 0.346              | 1.6                        | 0.078              |
| N-EtFOSAA    | 6.4                         | 0.247              | 1.9                        | 0.092              |
| PFDoA        | 3.9                         | 0.163              | 1.9                        | 0.056              |
| PFTeDA       | 0.87                        | 0.044              | 0.50                       | 0.032              |
| Total PFAS   | 362                         |                    | 385                        |                    |

**Table S12** Summary results of PFAS concentrations in biosolid processing Facility 7

| Compound     | Facility 7 Before Treatment |                    | Facility 7 After Treatment |                    |
|--------------|-----------------------------|--------------------|----------------------------|--------------------|
|              | Mean ng/g dry               | Standard deviation | Mean ng/g dry              | Standard deviation |
| PFPeA        | 0.00                        | N/A                | 0.0                        | N/A                |
| PFBS         | 1.0                         | 0.190              | 0.0                        | N/A                |
| PFHxA        | 2.8                         | 0.510              | 1.6                        | 0.038              |
| PFHpA        | 1.5                         | 0.233              | 0.0                        | N/A                |
| Oak 10       | 0.00                        | N/A                | 0.0                        | N/A                |
| FPePA        | 105                         | 16.884             | 65                         | 0.426              |
| 6:2FTS       | 0.00                        | N/A                | 0.22                       | 0.023              |
| PFOA         | 3.5                         | 0.642              | 1.1                        | 0.018              |
| PFOS         | 11                          | 0.739              | 9.1                        | 0.238              |
| PFNA         | 1.8                         | 0.251              | 0.90                       | 0.018              |
| Syn35        | 4.9                         | 0.723              | 1.3                        | 0.022              |
| 8:2FTS       | 0.00                        | N/A                | 0.0                        | N/A                |
| PFUdA        | 0.00                        | N/A                | 1.2                        | 0.064              |
| 6:2diPAP     | 750                         | 123.348            | 240                        | 3.073              |
| 6:2/8:2diPAP | 392                         | 63.456             | 140                        | 1.455              |
| 8:2 diPAP    | 300                         | 47.377             | 100                        | 0.494              |
| diSamPAP     | 2.0                         | 0.364              | 0.38                       | 0.030              |
| FHEA         | 0.00                        | N/A                | 0.0                        | N/A                |
| FHpPA        | 0.94                        | 0.092              | 0.59                       | 0.005              |
| FOSAA        | 40                          | 8.087              | 9.1                        | 0.382              |
| PFDA         | 7.4                         | 1.371              | 2.7                        | 0.050              |
| N-MeFOSAA    | 6.0                         | 0.264              | 4.4                        | 0.033              |
| N-EtFOSAA    | 7.6                         | 1.003              | 3.9                        | 0.062              |
| PFDoA        | 8.2                         | 1.707              | 2.0                        | 0.017              |
| PFTeDA       | 1.8                         | 0.267              | 0.72                       | 0.018              |
| Total PFAS   | 1650                        |                    | 584                        |                    |

**Table S13** Summary results of PFAS concentrations in biosolid processing Facility 8

| Compound     | Facility 8 Before Treatment |                    | Facility 8 After Treatment |                    |
|--------------|-----------------------------|--------------------|----------------------------|--------------------|
|              | Mean ng/g dry               | Standard deviation | Mean ng/g dry              | Standard deviation |
| PFPeA        | 13.9                        | 0.425              | 2.2                        | 0.139              |
| PFBS         | 0.0                         | 0.645              | 0.0                        | N/A                |
| PFHxA        | 6.7                         | 0.339              | 1.4                        | 0.042              |
| PFHpA        | 1.2                         | 0.132              | 0.32                       | 0.012              |
| Oak 10       | 0.0                         | N/A                | 0.21                       | 0.017              |
| FPePA        | 24                          | 1.353              | 21                         | 1.669              |
| 6:2FTS       | 0.0                         | N/A                | 0.82                       | 0.150              |
| PFOA         | 6.3                         | 0.230              | 4.9                        | 0.361              |
| PFOS         | 30                          | 2.673              | 14                         | 6.990              |
| PFNA         | 2.0                         | 0.037              | 2.7                        | 0.206              |
| Syn35        | 0.0                         | N/A                | 11                         | 0.544              |
| 8:2FTS       | 0.0                         | N/A                | 0.87                       | 0.143              |
| PFUdA        | 1.7                         | 0.135              | 1.5                        | 0.044              |
| 6:2diPAP     | 27                          | 1.233              | 160                        | 34.129             |
| 6:2/8:2diPAP | 24                          | 1.663              | 61.9                       | 10.547             |
| 8:2 diPAP    | 21                          | 0.787              | 59.7                       | 4.503              |
| diSamPAP     | 0.2                         | 0.006              | 0.2                        | 0.020              |
| FHEA         | 0.0                         | N/A                | 0.0                        | N/A                |
| FHpPA        | 0.5                         | 0.052              | 0.3                        | 0.023              |
| FOSAA        | 12                          | 0.639              | 8.4                        | 1.514              |
| PFDA         | 12                          | 0.631              | 24.2                       | 1.893              |
| N-MeFOSAA    | 5.4                         | 0.200              | 3.5                        | 0.263              |
| N-EtFOSAA    | 0.0                         | N/A                | 2.5                        | 0.094              |
| PFDoA        | 2.9                         | 0.189              | 5.2                        | 0.430              |
| PFTeDA       | 0.85                        | 0.035              | 0.87                       | 0.040              |
| Total PFAS   | 192                         |                    | 388                        |                    |

**Table S14** Extraction efficiencies for pooled samples of untreated and treated biosolids

| Compound     | Extraction Efficiency (Treated) % | Extraction Efficiency (Untreated) % |
|--------------|-----------------------------------|-------------------------------------|
| PFPeA        | 80                                | 117                                 |
| PFBS         | 93                                | 103                                 |
| PFHxA        | 92                                | 76                                  |
| PFHpA        | 82                                | 86                                  |
| Oak 10       | 57                                | 55                                  |
| FPePA        | 99                                | 103                                 |
| 6:2FTS       | 110                               | 83                                  |
| PFOA         | 99                                | 94                                  |
| PFOS         | 103                               | 106                                 |
| PFNA         | 94                                | 82                                  |
| Syn35        | 70                                | 69                                  |
| 8:2FTS       | 71                                | 84                                  |
| PFUdA        | 70                                | 74                                  |
| 6:2diPAP     | 107                               | 105                                 |
| 6:2/8:2diPAP | 93                                | 117                                 |
| 8:2 diPAP    | 104                               | 147                                 |
| diSamPAP     | 53                                | 52                                  |
| FHEA         | 107                               | 103                                 |
| FHpPA        | 105                               | 101                                 |
| FOSAA        | 88                                | 83                                  |
| PFDA         | 105                               | 101                                 |
| N-MeFOSAA    | 103                               | 94                                  |
| N-EtFOSAA    | 70                                | 68                                  |
| PFDoA        | 18                                | 18                                  |
| PFTeDA       | 79                                | 51                                  |
